# Supplementary material for: A Comparative Analysis of the Incidence, Severity and Duration of Smell and Taste Loss in COVID-19 Cases Versus Non-COVID-19 Cases: A Longitudinal Cohort Study
Source: MDPI journal article supplement (doi:10.3390/jcm12196267), 2023-09-28
Supplement: s1 [file s1]

Lifelines Corona Research Initiative:

H. Marike Boezen <sup>3</sup>, Jochen O. Mierau <sup>4,5,6</sup>, H. Lude Franke <sup>7</sup>, Jackie Dekens <sup>7,8</sup>, Patrick Deelen <sup>7</sup>,  
Pauline Lanting <sup>7</sup>, Judith M. Vonk <sup>3</sup>, Ilja Nolte <sup>3</sup>, Anil P. S. Ori <sup>7,9</sup>, Annique Claringbould <sup>7</sup>,  
Floranne Boulogne <sup>7</sup>, Marjolein X. L. Dijkema <sup>7</sup>, Henry H. Wiersma <sup>7</sup>, Robert Warmerdam <sup>7</sup>,  
Soesma A. Jankipersadsing <sup>7</sup>, Irene van Blokland <sup>7,10</sup> Geertruida H. de Bock <sup>3</sup>,  
Judith GM Rosmalen <sup>9,11</sup> and Cisca Wijmenga <sup>7</sup>

<sup>3</sup> Department of Epidemiology, University Medical Center Groningen, University of Groningen  
9713 GZ Groningen, The Netherlands

<sup>4</sup> Department of Economics, Econometrics & Finance, Faculty of Economics and Business,  
University of Groningen, 9712 CP Groningen, The Netherlands

<sup>5</sup> Lifelines Cohort Study and Biobank, 9300 AB Groningen, The Netherlands

<sup>6</sup> Team Strategy & External Relations, University Medical Center Groningen, University of  
Groningen,  
9713 GZ Groningen, The Netherlands

<sup>7</sup> Department of Genetics, University Medical Center Groningen, University of Groningen  
9713 GZ Groningen, The Netherlands

<sup>8</sup> Center of Development and Innovation, University Medical Center Groningen, University of  
Groningen, 9713 GZ Groningen, The Netherlands

<sup>9</sup> Department of Psychiatry, University Medical Center Groningen, University of Groningen  
9713 GZ Groningen, The Netherlands

<sup>10</sup> Department of Cardiology, University Medical Center Groningen, University of Groningen,  
9713 GZ Groningen, The Netherlands

<sup>11</sup> Department of Internal Medicine, University Medical Center Groningen, University of Groningen  
9713 GZ Groningen, The Netherlands
